# Supplementary material for: Promotion of Myoblast Differentiation by Fkbp5 via Cdk4 Isomerization
Source: PubMed Central journal article supplement — Cell Rep. Author manuscript; Available in PMC 2019 Jan 29. (PMC6350781; doi:10.1016/j.celrep.2018.11.006), 2018-11-27
Supplement: NIHMS1516188-supplement-1.pdf [file NIHMS1516188-supplement-1.pdf]

**Cell Reports, Volume 25**

**Supplemental Information**

**Promotion of Myoblast Differentiation by Fkbp5**

**via Cdk4 Isomerization**

**Mercedes Ruiz-Estevez, James Staats, Ellen Paatela, Dane Munson, Nobuko Katoku-Kikyo, Ce Yuan, Yoko Asakura, Reilly Hostager, Hiroshi Kobayashi, Atsushi Asakura, and Nobuaki Kikyo**

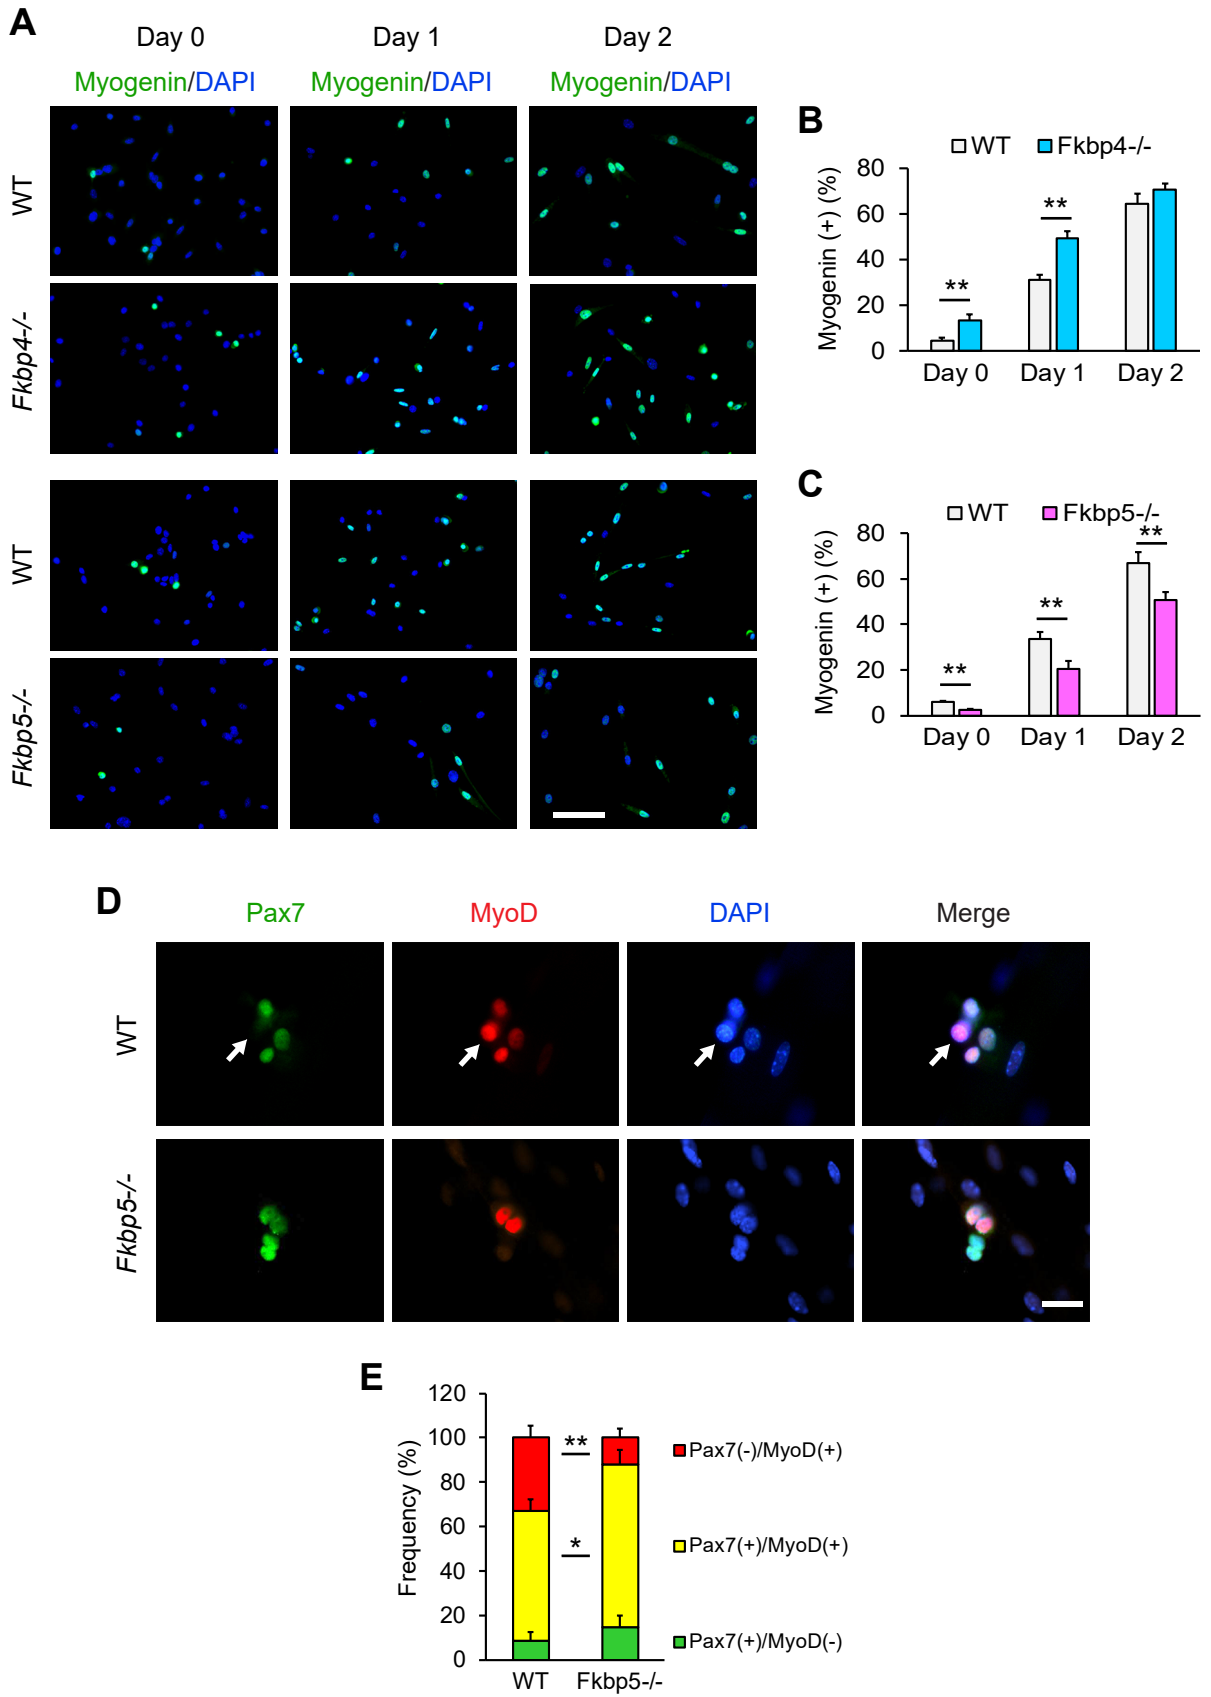

**Figure S1. Differentiation of primary myoblasts and myofibers prepared from *Fkbp* KO mice, Related to Figure 1.**

- (A) Temporal profile of myogenin expression in primary myoblasts prepared from WT and KO mice. DNA was counter stained with DAPI. Bar, 100  $\mu\text{m}$ .
  - (B) Frequency of myogenin (+) nuclei representing differentiating myoblasts prepared from WT and *Fkbp4*<sup>-/-</sup> mice.
  - (C) Frequency of myogenin (+) nuclei representing differentiating myoblasts prepared from WT and *Fkbp5*<sup>-/-</sup> mice.
  - (D) Immunofluorescence staining of single myofibers with antibodies against Pax7 (green) and MyoD (red) after culture for 72 hr. A Pax7(-)/MyoD(+) differentiating myoblast is indicated by arrows. Bars, 50  $\mu\text{m}$ .
  - (E) Frequency of Pax7(+)/MyoD(-), Pax7(+)/MyoD(+), and Pax7(-)/MyoD(+) cells per cluster in myofibers after culture for 72 hr. More than ten myofibers were counted for each genotype.
- \* < p < 0.05 and \*\* p < 0.01 with Student's t-test in (B), (C), and (E). Data are presented as mean  $\pm$  SD.

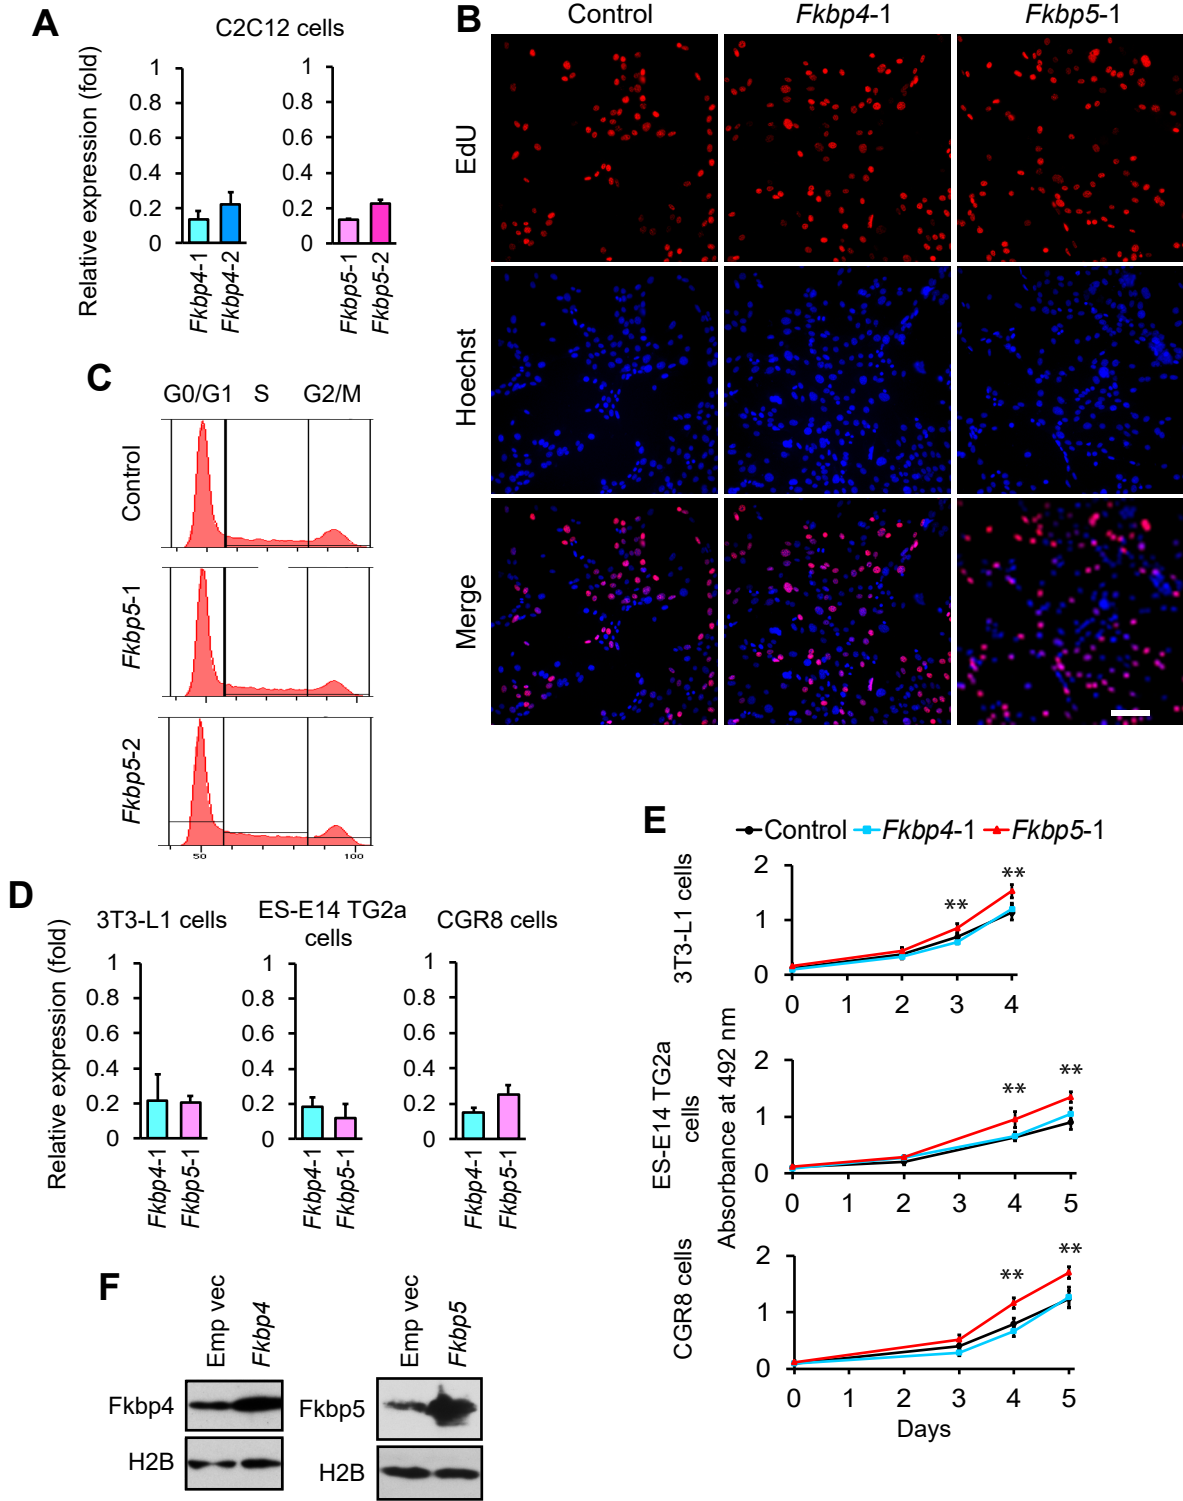

**Figure S2. Proliferation of various cell lines with *Fkbp4* and *Fkbp5* KD and overexpression, Related to Figure 2.**

- (A) Relative expression levels of *Fkbp4* and *Fkbp5* mRNAs in C2C12 cells after KD with two shRNA clones. The value obtained with the scrambled control shRNA was defined as 1.0 for each gene.
  - (B) EdU uptake in C2C12 cells with *Fkbp4* and *Fkbp5* KD. shRNA clone #1 was used for each. Bar, 100  $\mu$ m.
  - (C) Flow cytometry analysis of the cell cycle phases in C2C12 cells with *Fkbp5* KD.
  - (D) Relative expression levels of *Fkbp4* and *Fkbp5* mRNAs in the indicated three cell lines after KD with shRNA clone #1 for each gene.
  - (E) MTS assay for the proliferation of undifferentiated cells after KD.
  - (F) Western blotting of *Fkbp4* and *Fkbp5* comparing empty vector (Emp vec) and overexpressed cells. Histone H2B was detected as the loading control.
- \*\*  $p < 0.01$  with Student's t-test in comparison to the control cells. Data are presented as mean + or  $\pm$  SD of technical triplicates.

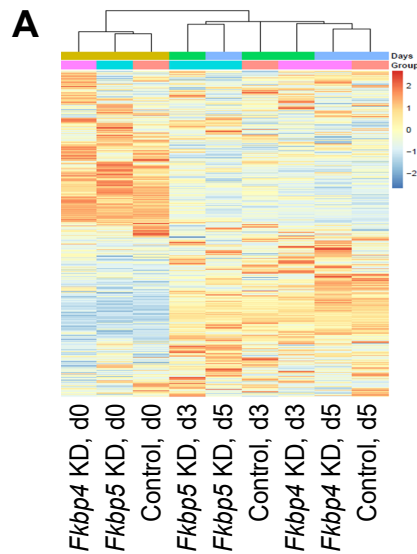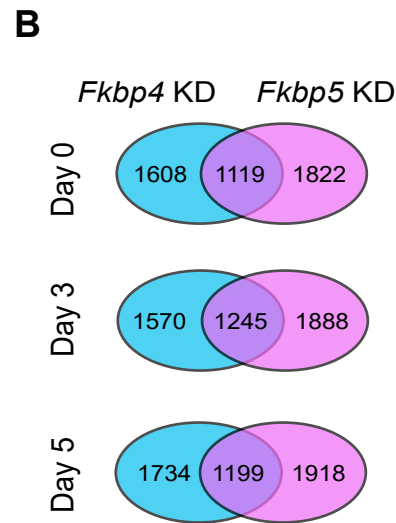

C

| Day                                                      | GO Biological Process                                      | GO Term                                 | Q-value    |          |
|----------------------------------------------------------|------------------------------------------------------------|-----------------------------------------|------------|----------|
| <b>Upregulated by Fkbp4 KD but unchanged by Fkbp5 KD</b> |                                                            |                                         |            |          |
| Day 0                                                    | sensory perception of chemical stimulus                    | GO:0007606                              | 3.99E-05   |          |
|                                                          | muscle organ development                                   | GO:0007517                              | 5.58E-05   |          |
|                                                          | sensory perception of smell                                | GO:0007608                              | 7.21E-05   |          |
|                                                          | muscle structure development                               | GO:0061061                              | 0.000447   |          |
|                                                          | muscle system process                                      | GO:0003012                              | 0.000858   |          |
|                                                          | skeletal muscle organ development                          | GO:0060538                              | 0.00123    |          |
|                                                          | striated muscle contraction                                | GO:0006941                              | 0.00149    |          |
|                                                          | striated muscle tissue development                         | GO:0014706                              | 0.00178    |          |
|                                                          | skeletal muscle tissue development                         | GO:0007519                              | 0.0023     |          |
|                                                          | muscle tissue development                                  | GO:0060537                              | 0.00272    |          |
| Day 3                                                    | N/A                                                        |                                         |            |          |
| Day 5                                                    | sensory perception of chemical stimulus                    | GO:0007606                              | 6.29E-05   |          |
|                                                          | sensory perception of smell                                | GO:0007608                              | 6.75E-05   |          |
|                                                          | DNA repair                                                 | GO:0006281                              | 0.0168     |          |
|                                                          | DNA conformation change                                    | GO:0071103                              | 0.0188     |          |
|                                                          | DNA packaging                                              | GO:0006323                              | 0.019      |          |
|                                                          | chromosome condensation                                    | GO:0030261                              | 0.0199     |          |
|                                                          | sensory perception                                         | GO:0007600                              | 0.0201     |          |
|                                                          | nuclear chromosome segregation                             | GO:0098813                              | 0.0241     |          |
|                                                          | chromosome segregation                                     | GO:0007059                              | 0.0387     |          |
|                                                          | central nervous system development                         | GO:0007417                              | 0.0466     |          |
|                                                          | <b>Downregulated by Fkbp4 KD but unchanged by Fkbp5 KD</b> |                                         |            |          |
|                                                          | Day 0                                                      | sensory perception of chemical stimulus | GO:0007606 | 5.67E-05 |
|                                                          |                                                            | sensory perception of smell             | GO:0007608 | 0.00331  |
| Day 3                                                    | sensory perception of chemical stimulus                    | GO:0007606                              | 0.000232   |          |
|                                                          | sensory perception of smell                                | GO:0007608                              | 0.000358   |          |
|                                                          | sensory perception                                         | GO:0007600                              | 0.0195     |          |
|                                                          | mitotic cell cycle                                         | GO:0000278                              | 0.0214     |          |
|                                                          | G-protein coupled receptor signaling pathway               | GO:0007186                              | 0.0243     |          |
|                                                          | regulation of apoptotic process                            | GO:0042981                              | 0.0446     |          |
|                                                          | vasculature development                                    | GO:0001944                              | 0.0494     |          |
|                                                          | mitotic cell cycle process                                 | GO:1903047                              | 0.0549     |          |
|                                                          | nervous system process                                     | GO:0050877                              | 0.0556     |          |
|                                                          | Day 5                                                      | sensory perception                      | GO:0007600 | 6.55E-06 |
| sensory perception of chemical stimulus                  |                                                            | GO:0007606                              | 1.29E-05   |          |
| nervous system process                                   |                                                            | GO:0050877                              | 1.35E-05   |          |
| sensory perception of smell                              |                                                            | GO:0007608                              | 0.000055   |          |
| system process                                           |                                                            | GO:0003008                              | 0.000142   |          |
| G-protein coupled receptor signaling pathway             |                                                            | GO:0007186                              | 0.0141     |          |

D

| Gene   | Fkbp4 KD | Fkbp5 KD | Control  |
|--------|----------|----------|----------|
| Acta1  | 64.3789  | 21.9912  | 26.3394  |
| Actc1  | 16.1701  | 5.27573  | 5.30062  |
| Asb2   | 1.01968  | 0.119246 | 0.10109  |
| Atp2a1 | 5.22118  | 1.59093  | 2.18857  |
| Casq2  | 7.64579  | 3.91062  | 3.42909  |
| Gm7325 | 5.52258  | 3.30605  | 2.6316   |
| Hira   | 26.2598  | 19.9358  | 13.7143  |
| Klhl40 | 1.14976  | 0.550772 | 0.373528 |
| Klhl41 | 4.1346   | 1.59973  | 1.62738  |
| Lmod3  | 1.93046  | 0.739803 | 1.04527  |
| Mef2c  | 5.93802  | 5.19829  | 2.9072   |
| Mybph  | 15.038   | 3.48579  | 4.89398  |
| Myh3   | 7.31454  | 1.62762  | 2.23672  |
| Myl1   | 162.849  | 116.985  | 76.0385  |
| Myl6b  | 13.9434  | 8.44615  | 6.64869  |
| Mylpf  | 528.335  | 248.413  | 173.238  |
| Myog   | 22.1951  | 8.25881  | 10.7462  |
| Nf1    | 6.56455  | 3.29237  | 3.46269  |
| Nog    | 1.36385  | 0.498907 | 0.422942 |
| Pbrm1  | 30.2152  | 16.0045  | 16.4193  |
| Pde5a  | 22.0994  | 15.9786  | 11.5854  |
| Ryr1   | 1.53666  | 0.898607 | 0.847074 |
| Tbx18  | 10.1294  | 4.3859   | 5.46377  |
| Tmem8c | 26.5212  | 7.78822  | 10.7065  |
| Tnnc1  | 96.1855  | 41.7279  | 44.3501  |
| Tnnc2  | 33.4149  | 14.4973  | 10.5947  |
| Tnnt1  | 30.7782  | 20.0999  | 15.9788  |
| Tnnt3  | 26.4005  | 8.46402  | 10.5598  |
| Ttn    | 1.10678  | 0.350495 | 0.543402 |
| Zfp609 | 7.08215  | 4.00654  | 3.9139   |
| Zfp689 | 2.77448  | 1.49771  | 1.08703  |

**Figure S3. RNA-seq analysis of *Fkbp4* and *Fkbp5* KD cells, Related to Figure 3.**

- (A) Heat map comparing the transcriptome of KD cells.
- (B) Venn diagrams displaying the number of genes whose expression levels were >180% or <56% of those of the control cells. shRNA clone #1 was used for *Fkbp4* and *Fkbp5* KD.
- (C and D) Enriched gene ontology (GO) terms in each comparison of the cell types. The genes belonging to the highlighted GO terms in yellow in (C) are listed in (D). The FPKM (Fragments per Kilobase of Exon per Million Fragments Mapped) was compared between *Fkbp4* KD, *Fkbp5* KD, and the control cells.

A

| Day                                                        | GO Biological Process                              | GO Term    | Q-value  |
|------------------------------------------------------------|----------------------------------------------------|------------|----------|
| <b>Upregulated by Fkbp5 KD but unchanged by Fkbp4 KD</b>   |                                                    |            |          |
| Day 0                                                      | sensory perception of smell                        | GO:0007608 | 0.0001   |
|                                                            | sensory perception of chemical stimulus            | GO:0007606 | 0.000138 |
|                                                            | sensory perception                                 | GO:0007600 | 0.0355   |
| Day 3                                                      | sensory perception of chemical stimulus            | GO:0007606 | 6.8E-09  |
|                                                            | sensory perception of smell                        | GO:0007608 | 1.24E-07 |
|                                                            | sensory perception                                 | GO:0007600 | 3.34E-05 |
|                                                            | G-protein coupled receptor signaling pathway       | GO:0007186 | 0.0205   |
|                                                            | negative regulation of cellular process            | GO:0048523 | 0.0286   |
|                                                            | cell projection organization                       | GO:0030030 | 0.0304   |
|                                                            | protein phosphorylation                            | GO:0006468 | 0.0309   |
|                                                            | nervous system process                             | GO:0050877 | 0.0376   |
|                                                            | phosphorylation                                    | GO:0016310 | 0.0457   |
| Day 5                                                      | sensory perception of chemical stimulus            | GO:0007606 | 8.66E-08 |
|                                                            | sensory perception of smell                        | GO:0007608 | 3.25E-06 |
|                                                            | sensory perception                                 | GO:0007600 | 0.00172  |
|                                                            | G-protein coupled receptor signaling pathway       | GO:0007186 | 0.0063   |
|                                                            | regulation of cellular component movement          | GO:0051270 | 0.0326   |
| <b>Downregulated by Fkbp5 KD but unchanged by Fkbp4 KD</b> |                                                    |            |          |
| Day 0                                                      | sensory perception of chemical stimulus            | GO:0007606 | 1.68E-06 |
|                                                            | negative regulation of cellular process            | GO:0048523 | 4.21E-05 |
|                                                            | negative regulation of biological process          | GO:0048519 | 6.49E-05 |
|                                                            | negative regulation of cellular metabolic process  | GO:0031324 | 9.23E-05 |
|                                                            | sensory perception of smell                        | GO:0007608 | 0.000112 |
|                                                            | negative regulation of metabolic process           | GO:0009892 | 0.000615 |
|                                                            | G-protein coupled receptor signaling pathway       | GO:0007186 | 0.000647 |
|                                                            | negative regulation of nitrogen compound metabolic | GO:0051172 | 0.000793 |
|                                                            | cellular metabolic process                         | GO:0044237 | 0.00148  |
|                                                            | macromolecule metabolic process                    | GO:0043170 | 0.0016   |
| Day 3                                                      | sensory perception of chemical stimulus            | GO:0007606 | 1.26E-08 |
|                                                            | sensory perception of smell                        | GO:0007608 | 3.03E-06 |
|                                                            | muscle system process                              | GO:0003012 | 1.27E-05 |
|                                                            | muscle contraction                                 | GO:0006936 | 2.00E-05 |
|                                                            | sensory perception                                 | GO:0007600 | 7.36E-05 |
|                                                            | striated muscle contraction                        | GO:0006941 | 3.28E-04 |
|                                                            | myofibril assembly                                 | GO:0030239 | 1.77E-03 |
|                                                            | sarcomere organization                             | GO:0045214 | 4.55E-03 |
|                                                            | muscle structure development                       | GO:0061061 | 1.37E-02 |
|                                                            | actomyosin structure organization                  | GO:0031032 | 1.49E-02 |
| Day 5                                                      | sensory perception of chemical stimulus            | GO:0007606 | 2.80E-08 |
|                                                            | metabolic process                                  | GO:0008152 | 1.71E-07 |
|                                                            | muscle contraction                                 | GO:0006936 | 9.63E-06 |
|                                                            | cellular metabolic process                         | GO:0044237 | 9.64E-06 |
|                                                            | macromolecule metabolic process                    | GO:0043170 | 0.000011 |
|                                                            | muscle structure development                       | GO:0061061 | 1.37E-05 |
|                                                            | muscle system process                              | GO:0003012 | 2.26E-05 |
|                                                            | regulation of nitrogen compound metabolic process  | GO:0051171 | 3.05E-05 |
|                                                            | muscle cell differentiation                        | GO:0042692 | 3.31E-05 |
|                                                            | striated muscle contraction                        | GO:0006941 | 3.38E-05 |

B

| Gene    | Fkbp4 KD | Fkbp5 KD | Control |
|---------|----------|----------|---------|
| Actc1   | 926.468  | 245.7    | 697.408 |
| Actn2   | 8.79924  | 4.099    | 7.89083 |
| Adora1  | 3.55611  | 1.99214  | 4.46089 |
| Angpt1  | 5.65446  | 4.8588   | 9.91276 |
| Ankrd2  | 22.7712  | 6.92621  | 20.6512 |
| Casq1   | 2.33726  | 2.0505   | 3.84586 |
| Casq2   | 258.243  | 121.178  | 235.089 |
| Cav3    | 16.6712  | 3.1437   | 16.5747 |
| Chrnd   | 121.751  | 38.5849  | 91.3575 |
| Gm7325  | 161.08   | 69.269   | 201.406 |
| Grip2   | 0.769205 | 0.457966 | 1.12782 |
| Hmcn2   | 1.24435  | 0.934076 | 2.09645 |
| Igf2    | 62.5932  | 37.025   | 82.4576 |
| Kcnh2   | 2.34116  | 1.02116  | 3.28211 |
| Kcnj2   | 3.73417  | 1.02099  | 3.78962 |
| Klf5    | 24.033   | 9.73356  | 23.9487 |
| Ldb3    | 38.6925  | 21.2559  | 39.6167 |
| Limch1  | 1.56533  | 0.909299 | 2.17372 |
| Lmod2   | 19.442   | 12.5597  | 26.9969 |
| Mapk14  | 32.7387  | 14.0297  | 29.0461 |
| Murc    | 114.807  | 55.2924  | 118.682 |
| Mybph   | 460.696  | 269.843  | 495.758 |
| Myc     | 16.9573  | 10.821   | 24.2648 |
| Myh4    | 2.46112  | 0.331384 | 1.47547 |
| Myh8    | 1.88479  | 0.79193  | 1.59269 |
| Myl4    | 540.681  | 333.925  | 727.592 |
| Myog    | 236.673  | 110.397  | 263.407 |
| Nog     | 3.36497  | 1.00468  | 1.96747 |
| Pou4f1  | 1.47128  | 0.71782  | 1.43465 |
| Prkar1a | 382.861  | 197.468  | 360.034 |
| Rgs2    | 1.70049  | 0.382702 | 1.53391 |
| Smarca2 | 3.89398  | 2.27508  | 5.32207 |
| Smpx    | 81.4153  | 25.0869  | 89.7319 |
| Sox11   | 9.26246  | 6.28244  | 12.0245 |
| Tcap    | 2.92216  | 1.43814  | 2.72965 |
| Tnnc2   | 1056.72  | 660.142  | 1263.69 |
| Tnni1   | 1029.76  | 630.594  | 1165.65 |
| Tnnt3   | 686.332  | 359.046  | 696.913 |
| Trim63  | 3.84917  | 2.59227  | 4.78362 |
| Unc45b  | 30.0017  | 9.98042  | 25.9177 |

C

| Gene    | Fkbp4 KD | Fkbp5 KD | Control |
|---------|----------|----------|---------|
| Actn2   | 55.82    | 13.0564  | 35.5083 |
| Atp2a1  | 403.873  | 100.48   | 346.637 |
| Atp2a2  | 225.592  | 122.373  | 224.952 |
| Cacna1s | 61.9828  | 26.8631  | 49.6371 |
| Cav3    | 43.6789  | 15.5797  | 42.3502 |
| Chd2    | 20.7953  | 6.07509  | 24.5802 |
| Chrne   | 3.31282  | 0.913014 | 4.62856 |
| Cln1    | 1.42818  | 0        | 1.04377 |
| Egr2    | 2.42194  | 1.32013  | 3.07006 |
| Eid2    | 1.70921  | 0.694328 | 1.54422 |
| Fer1l5  | 1.20298  | 0.542698 | 1.3587  |
| Fhod3   | 4.29211  | 2.02096  | 3.74561 |
| Foxn2   | 3.90664  | 3.29544  | 6.23112 |
| Gpd1l   | 18.2464  | 8.77815  | 21.069  |
| Homer1  | 15.2308  | 7.20533  | 13.3751 |
| Kcnj2   | 5.92892  | 1.18063  | 3.63235 |
| Kihl41  | 149.169  | 75.657   | 154.556 |
| Kmt5b   | 15.2283  | 9.23787  | 16.8488 |
| Mapk14  | 42.4241  | 13.7468  | 30.1726 |
| Megf10  | 23.2779  | 13.4282  | 25.4735 |
| Mybpc1  | 40.4816  | 6.00567  | 24.3031 |
| Myh1    | 56.7749  | 13.7139  | 45.3377 |
| Myh2    | 2.20026  | 0.549313 | 2.2822  |
| Myh3    | 629.797  | 290.569  | 530.028 |
| Myh4    | 61.1483  | 3.2321   | 37.8226 |
| Myh8    | 14.1357  | 2.22     | 12.04   |
| Mylk    | 5.97113  | 1.59709  | 4.47072 |
| Mylk2   | 11.0139  | 6.23079  | 11.6872 |
| Myo18b  | 5.79329  | 2.057    | 5.93707 |
| Myom1   | 43.5553  | 18.0599  | 33.6233 |
| Myoz1   | 2.04917  | 1.13513  | 2.73498 |
| Mypn    | 4.02729  | 1.43149  | 4.73011 |
| Neb     | 47.54    | 14.8121  | 38.3272 |
| Nfatc4  | 1.12756  | 0.813389 | 1.57317 |
| Nog     | 2.17899  | 0.968149 | 2.30702 |
| Obsl1   | 128.244  | 55.5888  | 117.483 |
| Pgam2   | 207.203  | 117.049  | 214.532 |
| Popdc2  | 3.48599  | 1.48254  | 3.62219 |
| Scn5a   | 5.33043  | 1.1992   | 4.798   |
| Sik1    | 30.9275  | 12.1614  | 23.4803 |
| Six4    | 5.65298  | 2.78037  | 5.27422 |
| Smpx    | 172.341  | 63.5886  | 198.735 |
| Sox11   | 13.0495  | 8.4705   | 16.5194 |
| Tanc1   | 28.0129  | 13.5502  | 26.2681 |
| Tbx18   | 11.6084  | 7.16329  | 14.1116 |
| Tcf7l2  | 4.57542  | 2.0448   | 5.70948 |
| Tgfb3   | 1.3814   | 1.16771  | 2.35669 |
| Tmtc3   | 11.3647  | 4.84463  | 12.1146 |
| Tnnc2   | 2197.18  | 998.407  | 2116.24 |
| Unc45b  | 50.4629  | 15.0574  | 39.1639 |



**Figure S4. RNA-seq analysis of *Fkbp4* and *Fkbp5* KD cells, Related to Figure 3.**

(A, B, and C) Enriched GO terms in each comparison of the cell types. The genes belonging to the highlighted GO terms in orange and blue in (A) are listed in (B) and (C), respectively. The FPKM was compared between *Fkbp4* KD, *Fkbp5* KD, and the control cells.

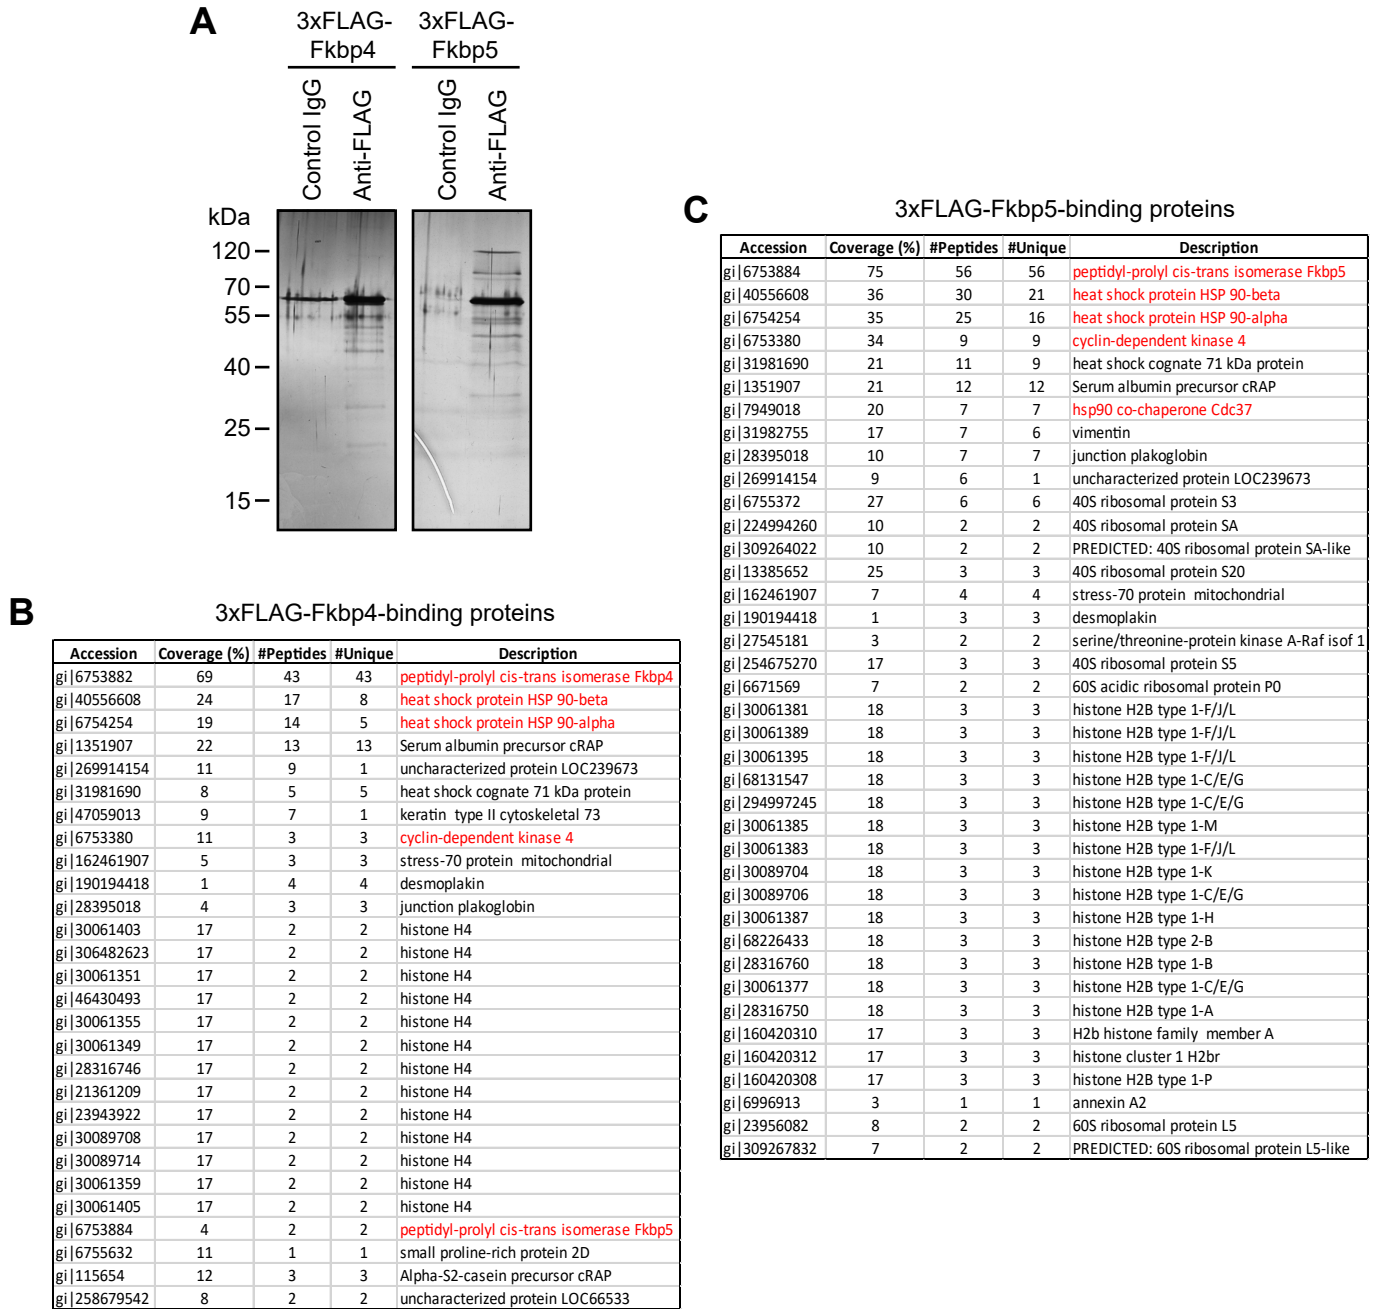

**Figure S5. Immunoprecipitation of Fkbp4- and Fkbp5-binding proteins from C2C12 cell extracts, Related to Figure 4.**

- (A) Silver staining of SDS-PAGE gels loaded with immunoprecipitated proteins from 3xFLAG-Fkbp4- and 3xFLAG-Fkbp5-expressing undifferentiated cells using anti-FLAG antibody and control IgG.
- (B and C) Lists of co-precipitated proteins with 3xFLAG-Fkbp4 (B) and 3xFLAG-Fkbp5 (C). Proteins in which more than one peptide sequences were detected are listed. Known Fkbp4- or Fkbp5-binding proteins are highlighted in red. We adjusted peptide false discovery rate (FDR) to 0.5% and protein FDR to 1.0%.

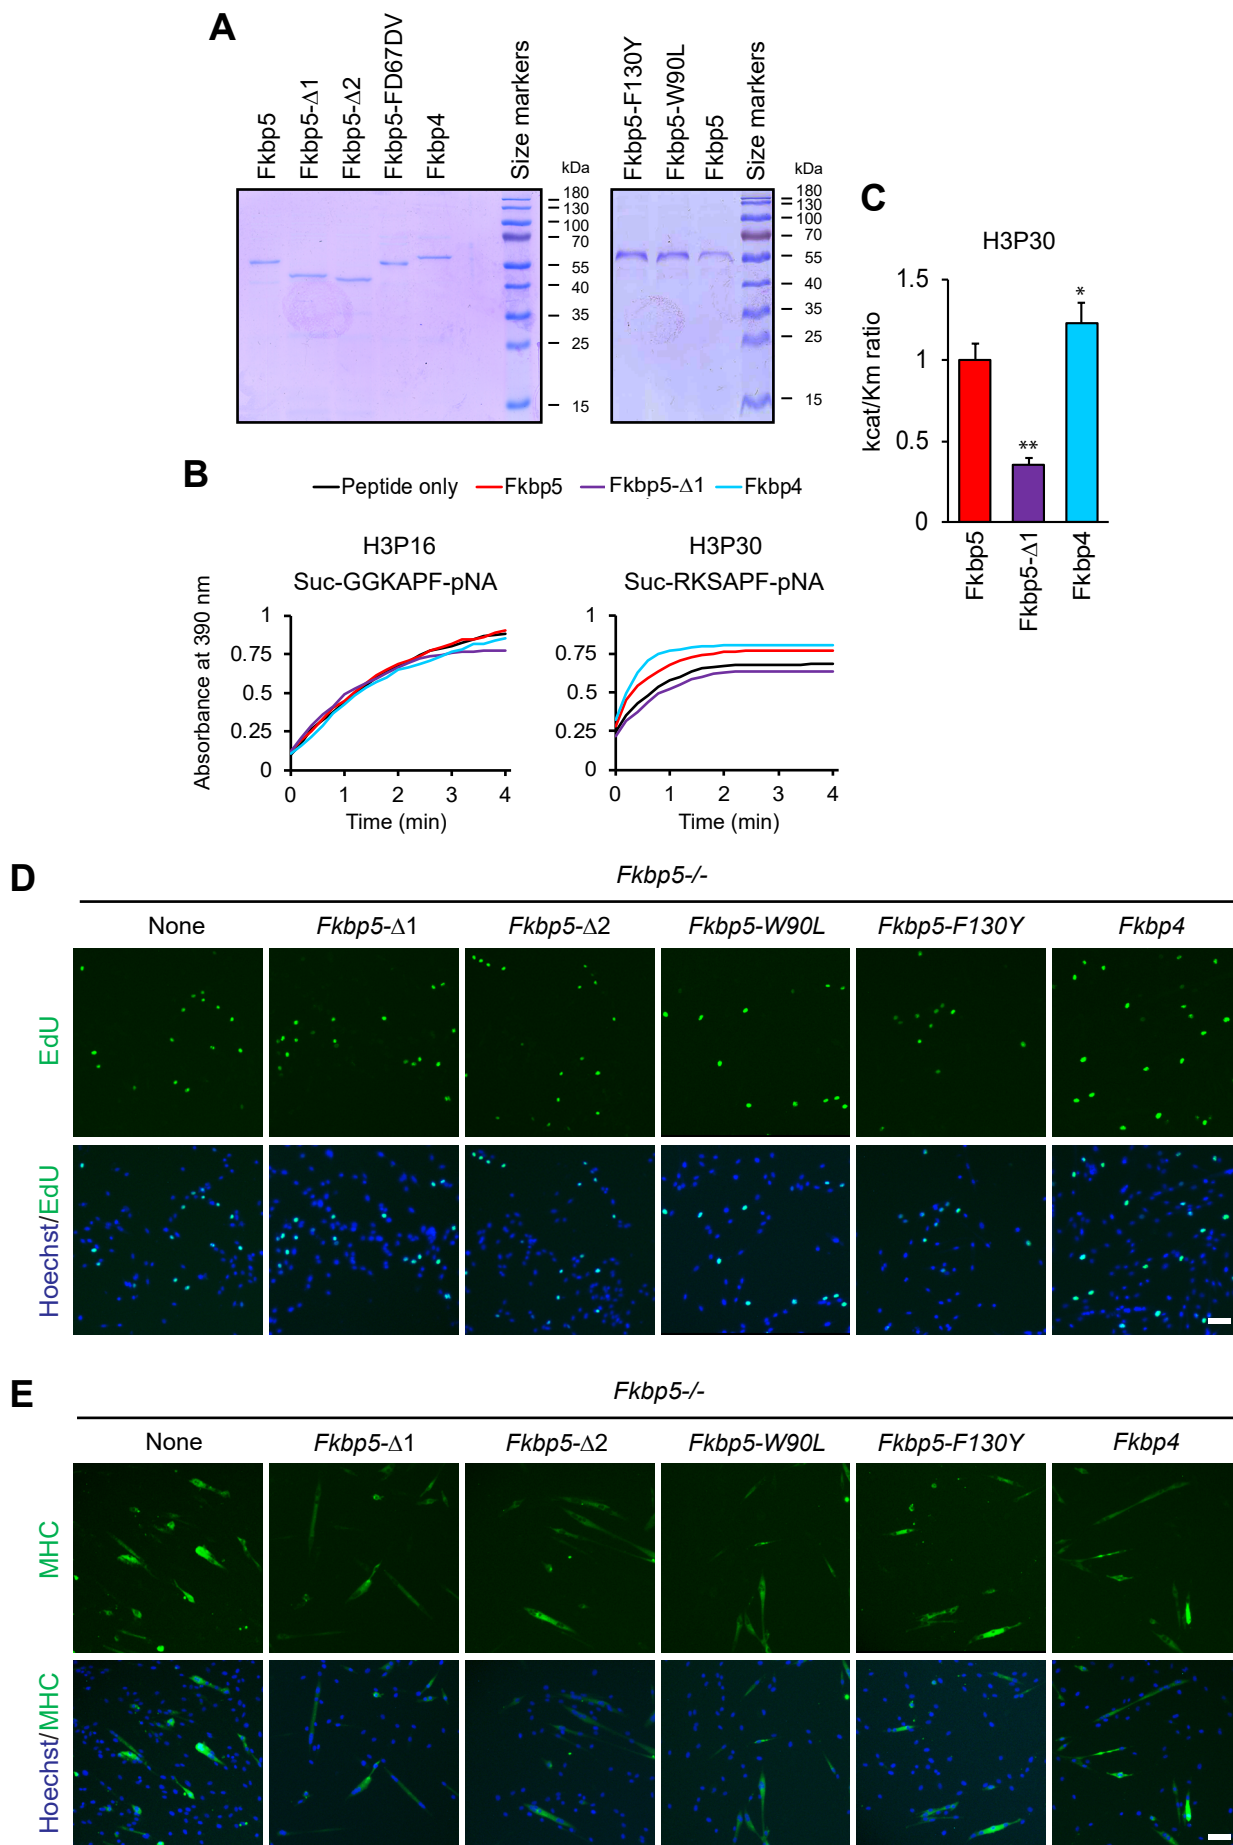

**Figure S6. PPIase activity and myogenic activity of Fkbp proteins, Related to Figures 5 and 6.**

- (A) Coomassie brilliant blue staining of an SDS-PAGE gel loaded with recombinant Fkbp4 and Fkbp5 proteins.
- (B) PPIase assays with indicated proteins and histone H3 peptides. Average of technical triplicates is shown.
- (C) Catalytic efficiency  $k_{cat}/K_M$  with Fkbp proteins and the H3P30 peptide. \*  $p < 0.05$  and \*\*  $p < 0.01$  with Student's t-test in comparison to Fkbp5. Data are presented as mean + SD of technical triplicates.
- (D) Uptake of EdU in *Fkbp5*<sup>-/-</sup> myoblasts transduced with Fkbp proteins on differentiation day 1. Bar, 100  $\mu\text{m}$ .
- (E) Immunostaining of MHC in *Fkbp5*<sup>-/-</sup> myoblasts transduced with Fkbp proteins on differentiation day 1.

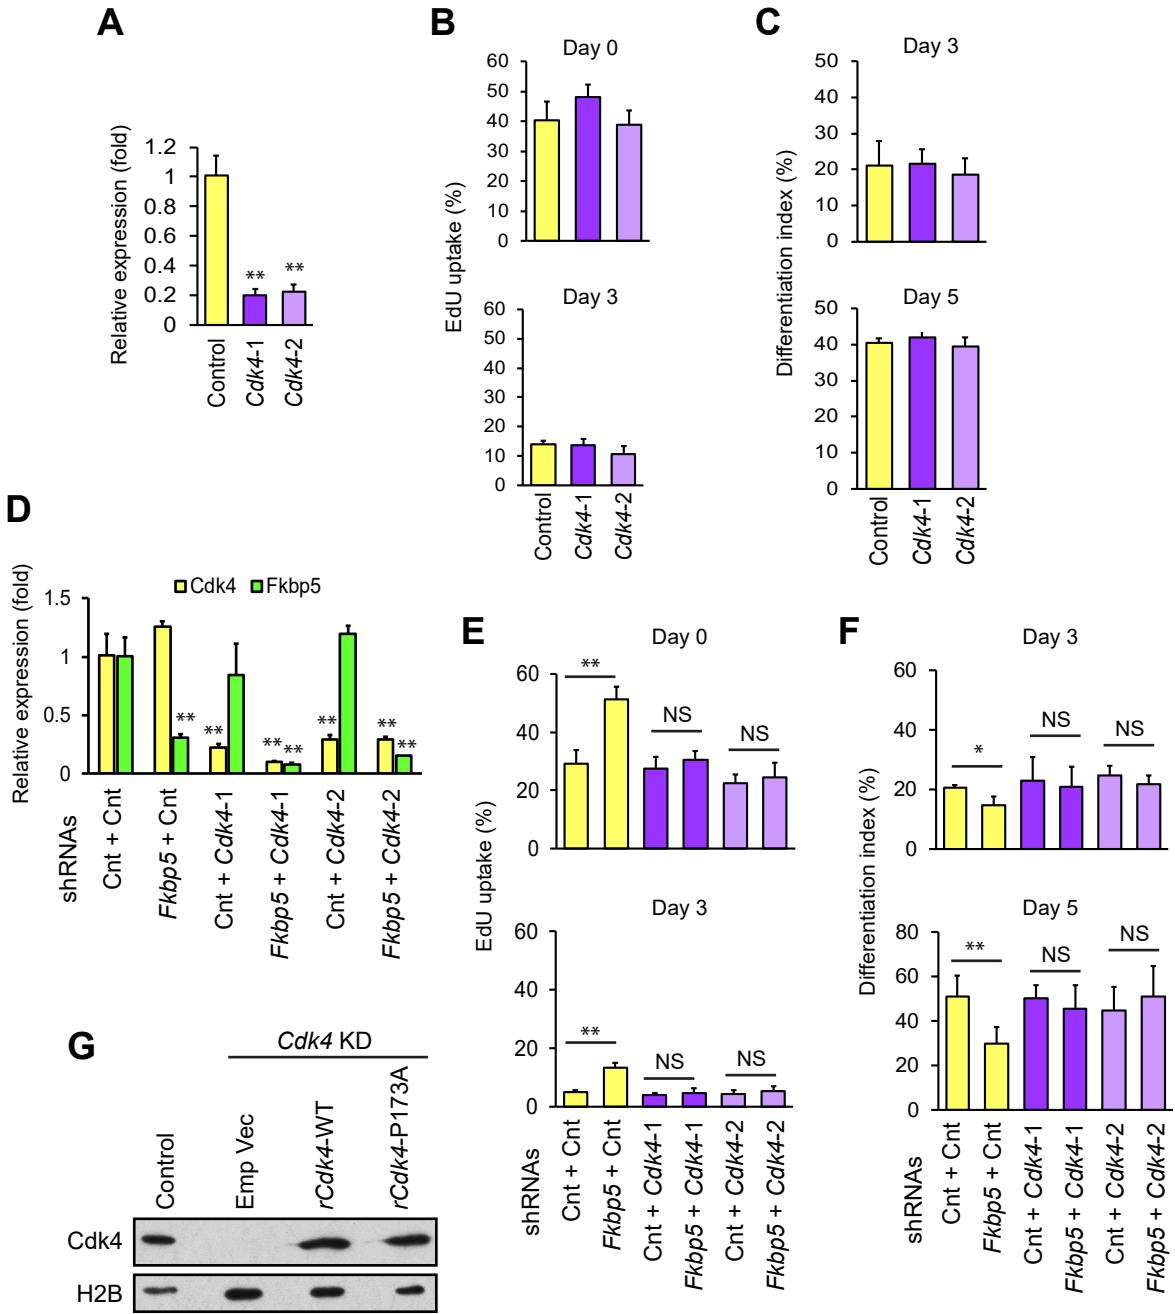

**Figure S7. Requirement of Cdk4 P173 for the inhibition of C2C12 cell proliferation by Fkbp5, Related to Figure 7.**

- (A) Relative expression levels of *Cdk4* mRNA in KD C2C12 cells with two shRNAs against *Cdk4*. The value obtained with the control shRNA was defined as 1.0.
- (B and C) EdU uptake (B) and the differentiation index (C) in the *Cdk4* KD cells.
- (D) Relative expression levels of *Cdk4* and *Fkbp5* mRNAs in double KD C2C12 cells. Cnt indicates the control shRNA.
- (E and F) EdU uptake (E) and the differentiation index (F) in the double KD cells.
- (G) Western blotting of overexpressed r*Cdk4*-WT and r*Cdk4*-P173A in the double KD cells.
- \*  $p < 0.05$  and \*\*  $p < 0.01$  with Student's t-test in comparison to the control cells (D, Cnt + Cnt) or between the two conditions indicated by the bar. NS indicates that the difference was statistically not significant. Data are presented as mean + SD of technical triplicates.

**Table S1. shRNA clones. Related to Figures 2, 3, 4, 7, S2, S3, S4, and S7.**

| <b>Gene</b>    | <b>Manufacturer</b> | <b>Catalog #</b> |
|----------------|---------------------|------------------|
| Control        | Sigma-Aldrich       | SHC016-1EA       |
| <i>Cdk4-1</i>  | GE Life Sciences    | TRCN0000023176   |
| <i>Cdk4-2</i>  | GE Life Sciences    | TRCN0000000364   |
| <i>Fkbp4-1</i> | GE Life Sciences    | TRCN0000111861   |
| <i>Fkbp4-2</i> | GE Life Sciences    | TRCN0000111862   |
| <i>Fkbp5-1</i> | GE Life Sciences    | TRCN0000111799   |
| <i>Fkbp5-2</i> | GE Life Sciences    | TRCN0000111796   |



**Table S2. Sequences of qPCR primers. Related to Figures 3, 7, S2, and S7.**

| <b>Gene</b>              | <b>Forward</b>           | <b>Reverse</b>                |
|--------------------------|--------------------------|-------------------------------|
| <i>MyoD</i>              | TGAGCAAAGTGAATGAGGCCTTCG | TGCAGACCTTCGATGTAGCGGAT       |
| Myogenin ( <i>Myog</i> ) | CCCTATTTCTACCAGGAGCCCCAC | GCGCAGGATCTCCACTTTAGGCAG      |
| Myomaker ( <i>Mymk</i> ) | ATCGCTACCAAGAGGCGTT      | CACAGCACAGACAAACCAGG          |
| MHC3 ( <i>Myh3</i> )     | CACCTGGAGAGGATGAAGAAGAA  | AAGACTTGACTTTCAC TTGGAGTTTATC |
| <i>Ckm</i>               | CTCAGCAAGCACAACAATCAC    | GATGACATCGTCCAGAGTGAAG        |
| <i>Gapdh</i>             | TGCACCACCAACTGCTTAG      | GATGCAGGGATGATGTTC            |
| <i>Cdk4</i>              | CTGATGGATGTCTGTGCTACTT   | AGGTGCTTTGTCCAGGTATG          |
| <i>Fkbp4</i>             | TTCCATCGTGTACCTCAAACC    | TCTTCAGCCGCACTTCATAC          |
| <i>Fkbp5</i>             | GAAAGGCGAGGGATACTCAA     | CCACATCTCGGCAATCAAATG         |
| <i>Hsp90b</i>            | CCTCAAAGAAGACCAGACAGAG   | CTCCCGTTCCTTCTCAAATAG         |
